# Supplementary material for: Multiplexed gene expression profiling identifies the FGFR4 pathway as a novel biomarker in intrahepatic cholangiocarcinoma
Source: PubMed Central journal article supplement (PMC5503556; doi:10.18632/oncotarget.16951), 2017-04-07
Supplement: oncotarget-08-38592-s001.pdf [file oncotarget-08-38592-s001.pdf]

## **Multiplexed gene expression profiling identifies the FGFR4 pathway as a novel biomarker in intrahepatic cholangiocarcinoma**

### **Supplementary Materials**

**Supplementary Table 1: Nano String gene list.** See Supplementary\_Table\_1
