# Supplementary material for: Multiplexed gene expression profiling identifies the FGFR4 pathway as a novel biomarker in intrahepatic cholangiocarcinoma
Source: PubMed Central journal article supplement (PMC5503556; doi:10.18632/oncotarget.16951), 2017-04-07
Supplement: oncotarget-08-38592-s002.pdf [file oncotarget-08-38592-s002.pdf]

| Group                         | Gene                       | Entrez_ID | Gene name                                               |
|-------------------------------|----------------------------|-----------|---------------------------------------------------------|
| <b>FGFR Pathway integrity</b> | FGF3                       | 2248      | fibroblast growth factor 3                              |
|                               | FGF4                       | 2249      | fibroblast growth factor 4                              |
|                               | FGF19                      | 9965      | fibroblast growth factor 19                             |
|                               | FGF21                      | 26291     | fibroblast growth factor 21                             |
|                               | FGF23                      | 8074      | fibroblast growth factor 23                             |
|                               | FGFR1                      | 2260      | fibroblast growth factor receptor 1                     |
|                               | FGFR2                      | 2263      | fibroblast growth factor receptor 2                     |
|                               | FGFR3                      | 2261      | fibroblast growth factor receptor 3                     |
|                               | FGFR4                      | 2264      | fibroblast growth factor receptor 4                     |
|                               | KLB                        | 152831    | klotho beta                                             |
| <b>Response markers</b>       | AFP                        | 174       | alpha-fetoprotein                                       |
|                               | ABCB11                     | 8647      | ATP-binding cassette, sub-family B (MDR/TAP), member 11 |
|                               | ACACB                      | 32        | acetyl-CoA carboxylase beta                             |
|                               | ACOX2                      | 8309      | acyl-CoA oxidase 2, branched chain                      |
|                               | AQP8                       | 343       | aquaporin 8                                             |
|                               | CYP17A1                    | 1586      | cytochrome P450, family 17, subfamily A, polypeptide 1  |
|                               | CYP27A1                    | 1593      | cytochrome P450, family 27, subfamily A, polypeptide 1  |
|                               | CYP7A1                     | 1581      | cytochrome P450, family 7, subfamily A, polypeptide 1   |
|                               | CYP7B1                     | 9420      | cytochrome P450, family 7, subfamily B, polypeptide 1   |
|                               | CYP8B1                     | 1582      | cytochrome P450, family 8, subfamily B, polypeptide 1   |
|                               | EGR1                       | 1958      | early growth response 1                                 |
|                               | HMGCR                      | 3156      | 3-hydroxy-3-methylglutaryl-CoA reductase                |
|                               | IGFBP2                     | 3485      | insulin-like growth factor binding protein 2            |
|                               | LEPR                       | 3953      | leptin receptor                                         |
|                               | NR0B2                      | 8431      | nuclear receptor subfamily 0, group B, member 2         |
|                               | NRIP1                      | 8204      | nuclear receptor interacting protein 1                  |
|                               | SCD                        | 6319      | stearoyl-CoA desaturase                                 |
|                               | SQLE                       | 6713      | squalene epoxidase                                      |
|                               | FRS2                       | 10818     | fibroblast growth factor receptor substrate 2           |
|                               | <b>Oncogenic signaling</b> | AKT1      | 207                                                     |
| ARID1A                        |                            | 8289      | AT rich interactive domain 1A (SWI-like)                |
| BAD                           |                            | 572       | BCL2-associated agonist of cell death                   |

|                    |        |                                                             |
|--------------------|--------|-------------------------------------------------------------|
| BAX                | 581    | BCL2-associated X protein                                   |
| BCL2L1             | 598    | BCL2-like 1                                                 |
| BIRC5              | 332    | baculoviral IAP repeat containing 5                         |
| BRD7               | 29117  | bromodomain containing 7                                    |
| CASP9              | 842    | caspase 9, apoptosis-related cysteine peptidase             |
| CDK1               | 983    | cyclin-dependent kinase 1                                   |
| CDKN1A             | 1026   | cyclin-dependent kinase inhibitor 1A                        |
| CDKN1B             | 1027   | cyclin-dependent kinase inhibitor 1B                        |
| CTNNB1             | 1499   | catenin (cadherin-associated protein), beta 1, 88kDa        |
| DAXX               | 1616   | death-domain associated protein                             |
| GLUL               | 2752   | glutamate-ammonia ligase                                    |
| HGF                | 3082   | hepatocyte growth factor (hepapoietin A; scatter factor)    |
| LGR5               | 8549   | leucine-rich repeat containing G protein-coupled receptor 5 |
| MIR21              | 406991 | microRNA 21                                                 |
| NCOR1              | 9611   | nuclear receptor corepressor 1                              |
| NF1                | 4763   | neurofibromin 1                                             |
| TGFB1              | 7040   | transforming growth factor, beta 1                          |
| TSC1               | 7248   | tuberous sclerosis 1                                        |
| TSC2               | 7249   | tuberous sclerosis 2                                        |
| ARID2              | 196528 | AT rich interactive domain 2 (ARID, RFX-like)               |
| CDKN3              | 1033   | cyclin-dependent kinase inhibitor 3                         |
| AURKB              | 9212   | aurora kinase B                                             |
| CCNB1              | 891    | cyclin B1                                                   |
| CYP2E1             | 1571   | cytochrome P450, family 2, subfamily E, polypeptide 1       |
| ADH1B              | 125    | alcohol dehydrogenase 1B                                    |
| HGFAC              | 3083   | HGF activator                                               |
| APOF               | 319    | apolipoprotein F                                            |
| FCN2               | 2220   | ficolin (collagen/fibrinogen domain containing lectin) 2    |
| <hr/>              |        |                                                             |
| <b>CNV matched</b> | AXIN1  | 8312 axin 1                                                 |
|                    | BICC1  | 80114 BicC family RNA binding protein 1                     |
|                    | CCND1  | 595 cyclin D1                                               |
|                    | CDKN2A | 1029 cyclin-dependent kinase inhibitor 2A                   |
|                    | ELL    | 8178 elongation factor RNA polymerase II                    |

|        |        |                                                     |
|--------|--------|-----------------------------------------------------|
| ERBB2  | 2064   | erb-b2 receptor tyrosine kinase 2                   |
| MAP2K3 | 5606   | mitogen-activated protein kinase kinase 3           |
| MET    | 4233   | MET proto-oncogene, receptor tyrosine kinase        |
| MYC    | 4609   | v-myc avian myelocytomatosis viral oncogene homolog |
| ORAOV1 | 220064 | oral cancer overexpressed 1                         |
| PTEN   | 5728   | phosphatase and tensin homolog                      |
| RB1    | 5925   | retinoblastoma 1                                    |
| RECQL4 | 9401   | RecQ protein-like 4                                 |
| SAV1   | 60485  | salvador family WW domain containing protein 1      |
| TERT   | 7015   | telomerase reverse transcriptase                    |
| TP53   | 7157   | tumor protein p53                                   |
| TRIM45 | 80263  | tripartite motif containing 45                      |
| VEGFA  | 7422   | vascular endothelial growth factor A                |

---

**Controls**

|          |        |                                                                        |
|----------|--------|------------------------------------------------------------------------|
| ACTB     | 60     | actin, beta                                                            |
| BRAP     | 8315   | BRCA1 associated protein                                               |
| CNOT2    | 4848   | CCR4-NOT transcription complex, subunit 2                              |
| COX15    | 1355   | COX15 homolog, cytochrome c oxidase assembly protein (yeast)           |
| CTCF     | 10664  | CCCTC-binding factor (zinc finger protein)                             |
| EIF2B1   | 1967   | eukaryotic translation initiation factor 2B, subunit 1 alpha, 26kDa    |
| FAM149B1 | 317662 | family with sequence similarity 149, member B1                         |
| FAM175B  | 23172  | family with sequence similarity 175, member B                          |
| FBXO18   | 84893  | F-box protein, helicase, 18                                            |
| GAPDH    | 2597   | glyceraldehyde-3-phosphate dehydrogenase                               |
| NRF1     | 4899   | nuclear respiratory factor 1                                           |
| SDHAF2   | 54949  | chromosome 11 open reading frame 79                                    |
| SF1      | 7536   | splicing factor 1                                                      |
| SUPT7L   | 9913   | suppressor of Ty 7 ( <i>S. cerevisiae</i> )-like                       |
| SUPV3L1  | 6832   | suppressor of var1, 3-like 1 ( <i>S. cerevisiae</i> )                  |
| TIAL1    | 7073   | TIA1 cytotoxic granule-associated RNA binding protein-like 1           |
| VTI1B    | 10490  | vesicle transport through interaction with t-SNAREs homolog 1B (yeast) |
| WDR33    | 55339  | WD repeat domain 33                                                    |
| YY1      | 7528   | YY1 transcription factor                                               |
| ZNF143   | 7702   | zinc finger protein 143                                                |

---
